# Supplementary material for: Methanobrevibacter attenuation via probiotic intervention reduces flatulence in adult human: A non-randomised paired-design clinical trial of efficacy
Source: PubMed Central journal article supplement (PMC5609747; doi:10.1371/journal.pone.0184547), 2017-09-22
Supplement: pone.0184547.s001.pdf [file pone.0184547.s001.pdf]

**S1 Table. Number of successfully assembled sequences**

| <b>ID</b> | <b>Total # of pairs</b> | <b>Combined_Pairs</b> | <b>Percent combined</b> | <b>Total # of pairs</b> | <b>Combined_Pairs</b> | <b>Percent combined</b> |
|-----------|-------------------------|-----------------------|-------------------------|-------------------------|-----------------------|-------------------------|
| 1         | 659,608                 | 436,804               | 66.22%                  | 666,744                 | 485,977               | 72.89%                  |
| 2         | 535,965                 | 357,966               | 66.79%                  | 807,347                 | 601,097               | 74.45%                  |
| 3         | 961,467                 | 614,881               | 63.95%                  | 660,574                 | 507,442               | 76.82%                  |
| 4         | 701,337                 | 438,468               | 62.52%                  | 740,494                 | 498,639               | 67.34%                  |
| 5         | 640,851                 | 435,490               | 67.95%                  | 871,912                 | 663,811               | 76.13%                  |
| 6         | 717,033                 | 486,245               | 67.81%                  | 334,602                 | 255,793               | 76.45%                  |
| 7         | 862,555                 | 567,368               | 65.78%                  | 700,470                 | 530,556               | 75.74%                  |
| 8         | 586,821                 | 375,763               | 64.03%                  | 790,058                 | 582,793               | 73.77%                  |
| 9         | 808,002                 | 549,937               | 68.06%                  | 726,022                 | 504,805               | 69.53%                  |
| 10        | 885,158                 | 579,954               | 65.52%                  | 584,101                 | 427,670               | 73.22%                  |
| 11        | 697,989                 | 480,262               | 68.81%                  | 258,279                 | 190,291               | 73.68%                  |
| 12        | 1,559,696               | 1,078,672             | 69.16%                  | 569,246                 | 440,592               | 77.40%                  |
| 14        | 937,413                 | 653,688               | 69.73%                  | 598,578                 | 457,070               | 76.36%                  |
| 15        | 728,084                 | 475,277               | 65.28%                  | 391,549                 | 289,772               | 74.01%                  |
| 16        | 706,993                 | 506,800               | 71.68%                  | 639,145                 | 475,502               | 74.40%                  |
| 17        | 739,033                 | 520,020               | 70.36%                  | 351,069                 | 264,555               | 75.36%                  |
| 18        | 1,109,510               | 597,002               | 53.81%                  | 525,082                 | 389,329               | 74.15%                  |
| 20        | 632,610                 | 425,657               | 67.29%                  | 366,555                 | 277,983               | 75.84%                  |
| 21        | 1,014,321               | 755,294               | 74.46%                  | 675,617                 | 350,901               | 51.94%                  |
|           | Before trial            |                       |                         | After trial             |                       |                         |
