# Supplementary material for: Methanobrevibacter attenuation via probiotic intervention reduces flatulence in adult human: A non-randomised paired-design clinical trial of efficacy
Source: PubMed Central journal article supplement (PMC5609747; doi:10.1371/journal.pone.0184547), 2017-09-22
Supplement: pone.0184547.s002.pdf [file pone.0184547.s002.pdf]

**S2 Table. Observed OTUs' abundances in each sample**

| <b>ID</b> | <b>Before</b> | <b>After</b> | <b>Before-After</b> |
|-----------|---------------|--------------|---------------------|
| <b>1</b>  | 403,514       | 441,949      | -38,435             |
| <b>2</b>  | 336,086       | 548,542      | -212,456            |
| <b>3</b>  | 583,223       | 465,055      | 118,168             |
| <b>4</b>  | 411,158       | 437,118      | -25,960             |
| <b>5</b>  | 412,500       | 609,146      | -196,646            |
| <b>6</b>  | 453,077       | 236,030      | 217,047             |
| <b>7</b>  | 518,747       | 473,792      | 44,955              |
| <b>8</b>  | 350,965       | 521,882      | -170,917            |
| <b>9</b>  | 518,040       | 461,093      | 56,947              |
| <b>10</b> | 550,258       | 390,568      | 159,690             |
| <b>11</b> | 451,234       | 176,054      | 275,180             |
| <b>12</b> | 1,024,835     | 412,634      | 612,201             |
| <b>14</b> | 620,032       | 414,397      | 205,635             |
| <b>15</b> | 452,960       | 268,565      | 184,395             |
| <b>16</b> | 474,057       | 430,098      | 43,959              |
| <b>17</b> | 492,563       | 246,498      | 246,065             |
| <b>18</b> | 553,490       | 348,439      | 205,051             |
| <b>20</b> | 405,017       | 257,754      | 147,263             |
| <b>21</b> | 713,954       | 299,192      | 414,762             |
