# Supplementary material for: Methanobrevibacter attenuation via probiotic intervention reduces flatulence in adult human: A non-randomised paired-design clinical trial of efficacy
Source: PubMed Central journal article supplement (PMC5609747; doi:10.1371/journal.pone.0184547), 2017-09-22
Supplement: pone.0184547.s003.pdf [file pone.0184547.s003.pdf]

**S3 Table. The 16 significantly detected genera (FDR adjusted P-value < 0.05)**

| <b>Phylum</b>  | <b>Family</b>           | <b>Genus</b>               | <b>P_value</b> | <b>FDR</b> | <b>logFC</b> |
|----------------|-------------------------|----------------------------|----------------|------------|--------------|
| Bacteroidetes  | [Paraprevotellaceae]    | <b>CF231</b>               | 0.000138       | 2.84E-03   | -2.96525     |
| Bacteroidetes  | Bacteroidaceae          | <b>Bacteroides</b>         | 0.004042       | 3.65E-02   | 1.151583     |
| Bacteroidetes  | Flavobacteriaceae       | <b>Flavobacterium</b>      | 0.006028       | 4.82E-02   | -2.39396     |
| Cyanobacteria  | Synechococcaceae        | <b>Synechococcus</b>       | 3.11E-05       | 7.95E-04   | -4.64196     |
| Euryarchaeota  | Methanobacteriaceae     | <b>Methanobrevibacter</b>  | 9.94E-06       | 3.31E-04   | -3.87502     |
| Firmicutes     | Lachnospiraceae         | <b>Pseudobutyrvibrio</b>   | 1.03E-05       | 3.31E-04   | 4.216203     |
| Firmicutes     | Ruminococcaceae         | <b>Faecalibacterium</b>    | 0.00016        | 2.84E-03   | -1.13834     |
| Firmicutes     | Erysipelotrichaceae     | <b>[Eubacterium]</b>       | 0.001157       | 1.65E-02   | -2.05939     |
| Firmicutes     | Veillonellaceae         | <b>Megamonas</b>           | 0.002199       | 2.17E-02   | -1.9666      |
| Firmicutes     | Veillonellaceae         | <b>Mitsuokella</b>         | 0.004282       | 3.65E-02   | -2.63018     |
| Proteobacteria | Enterobacteriaceae      | <b>Citrobacter</b>         | 2.44E-11       | 3.13E-09   | -9.2212      |
| Proteobacteria | Enterobacteriaceae      | <b>Klebsiella</b>          | 6.26E-09       | 4.01E-07   | -5.49062     |
| Proteobacteria | Halomonadaceae          | <b>Candidatus Portiera</b> | 0.000177       | 2.84E-03   | -3.57809     |
| Proteobacteria | Enterobacteriaceae      | <b>Enterobacter</b>        | 0.00147        | 1.83E-02   | -3.41043     |
| Proteobacteria | Vibrionaceae            | <b>Aliivibrio</b>          | 0.001576       | 1.83E-02   | 2.468071     |
| Synergistetes  | Dethiosulfovibrionaceae | <b>Pyramidobacter</b>      | 0.001797       | 1.92E-02   | 3.771663     |
