# Supplementary material for: Methanobrevibacter attenuation via probiotic intervention reduces flatulence in adult human: A non-randomised paired-design clinical trial of efficacy
Source: PubMed Central journal article supplement (PMC5609747; doi:10.1371/journal.pone.0184547), 2017-09-22
Supplement: pone.0184547.s004.pdf [file pone.0184547.s004.pdf]

**S1 Table. The 19 significantly detected family-level OTUs (FDR adjusted P-value < 0.05)**

| <b>Phylum</b>  | <b>Family</b>                  | <b>P_value</b> | <b>FDR</b> | <b>logFC</b> |
|----------------|--------------------------------|----------------|------------|--------------|
| Actinobacteria | <b>OCS155</b>                  | 1.39E-08       | 8.81E-07   | -4.44248     |
| Firmicutes     | <b>Peptostreptococcaceae</b>   | 2.07E-08       | 8.81E-07   | 4.877239     |
| Proteobacteria | <b>Pelagibacteraceae</b>       | 1.77E-05       | 3.76E-04   | -4.94507     |
| Proteobacteria | <b>Halomonadaceae</b>          | 1.33E-05       | 3.76E-04   | -3.85315     |
| Euryarchaeota  | <b>Methanobacteriaceae</b>     | 3.01E-05       | 5.12E-04   | -3.75728     |
| SAR406         | <b>A714017</b>                 | 8.59E-05       | 1.22E-03   | -3.2943      |
| Cyanobacteria  | <b>Synechococcaceae</b>        | 0.000222       | 2.70E-03   | -4.36532     |
| Bacteroidetes  | <b>Flavobacteriaceae</b>       | 0.000279       | 2.96E-03   | -3.87584     |
| Proteobacteria | <b>Rhodobacteraceae</b>        | 0.00041        | 3.16E-03   | -3.65558     |
| Proteobacteria | <b>AEGEAN_112</b>              | 0.000372       | 3.16E-03   | -2.99686     |
| Proteobacteria | <b>OM60</b>                    | 0.00034        | 3.16E-03   | -2.9729      |
| Proteobacteria | <b>Piscirickettsiaceae</b>     | 0.000626       | 4.43E-03   | -2.76107     |
| Synergistetes  | <b>Dethiosulfovibrionaceae</b> | 0.001699       | 1.11E-02   | 3.665901     |
| Bacteroidetes  | <b>[Barnesiellaceae]</b>       | 0.003051       | 1.73E-02   | 2.113337     |
| Firmicutes     | <b>Planococcaceae</b>          | 0.003037       | 1.73E-02   | 2.369546     |
| Proteobacteria | <b>Moritellaceae</b>           | 0.005573       | 2.96E-02   | 1.985535     |
| Proteobacteria | <b>Bradyrhizobiaceae</b>       | 0.006686       | 3.34E-02   | 2.047661     |
| Bacteroidetes  | <b>Bacteroidaceae</b>          | 0.010298       | 4.64E-02   | 1.065054     |
| Proteobacteria | <b>mitochondria</b>            | 0.010364       | 4.64E-02   | -1.97439     |
