# Supplementary material for: Methanobrevibacter attenuation via probiotic intervention reduces flatulence in adult human: A non-randomised paired-design clinical trial of efficacy
Source: PubMed Central journal article supplement (PMC5609747; doi:10.1371/journal.pone.0184547), 2017-09-22
Supplement: pone.0184547.s005.pdf [file pone.0184547.s005.pdf]

**S1 Table. The two significantly detected phyla (FDR adjusted P-value < 0.05)**

| <b>Domain</b> | <b>Phylum</b>        | <b>P_value</b> | <b>FDR</b> | <b>logFC</b> |
|---------------|----------------------|----------------|------------|--------------|
| Archaea       | <b>Euryarchaeota</b> | 8.86E-06       | 1.51E-04   | -3.93771     |
| Bacteria      | <b>SAR406</b>        | 0.000339       | 2.88E-03   | -3.16416     |
