# Supplementary material for: Methanobrevibacter attenuation via probiotic intervention reduces flatulence in adult human: A non-randomised paired-design clinical trial of efficacy
Source: PubMed Central journal article supplement (PMC5609747; doi:10.1371/journal.pone.0184547), 2017-09-22
Supplement: pone.0184547.s006.pdf [file pone.0184547.s006.pdf]

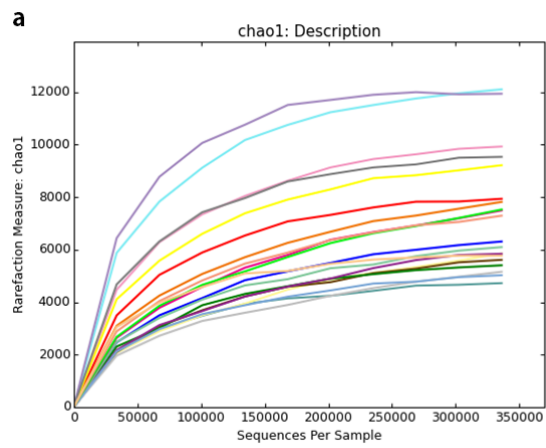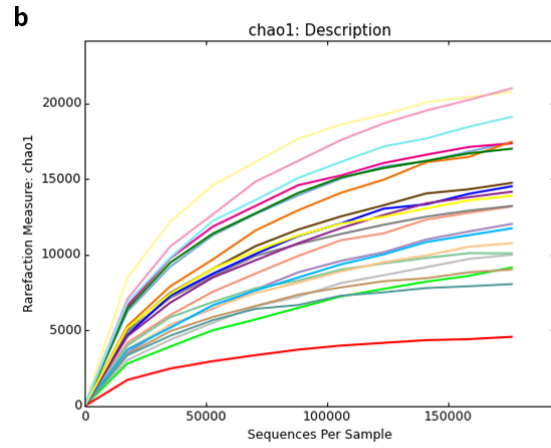

**S1 Fig. Rarefaction curves to investigate OTUs were measured by increasing number of sequences in (a) before- and (b) after- metagenome experiments. In the plot, *chao1* index was employed to measure alpha diversity in observed OTUs.**
