# Supplementary material for: Methanobrevibacter attenuation via probiotic intervention reduces flatulence in adult human: A non-randomised paired-design clinical trial of efficacy
Source: PubMed Central journal article supplement (PMC5609747; doi:10.1371/journal.pone.0184547), 2017-09-22
Supplement: pone.0184547.s010.pdf [file pone.0184547.s010.pdf]

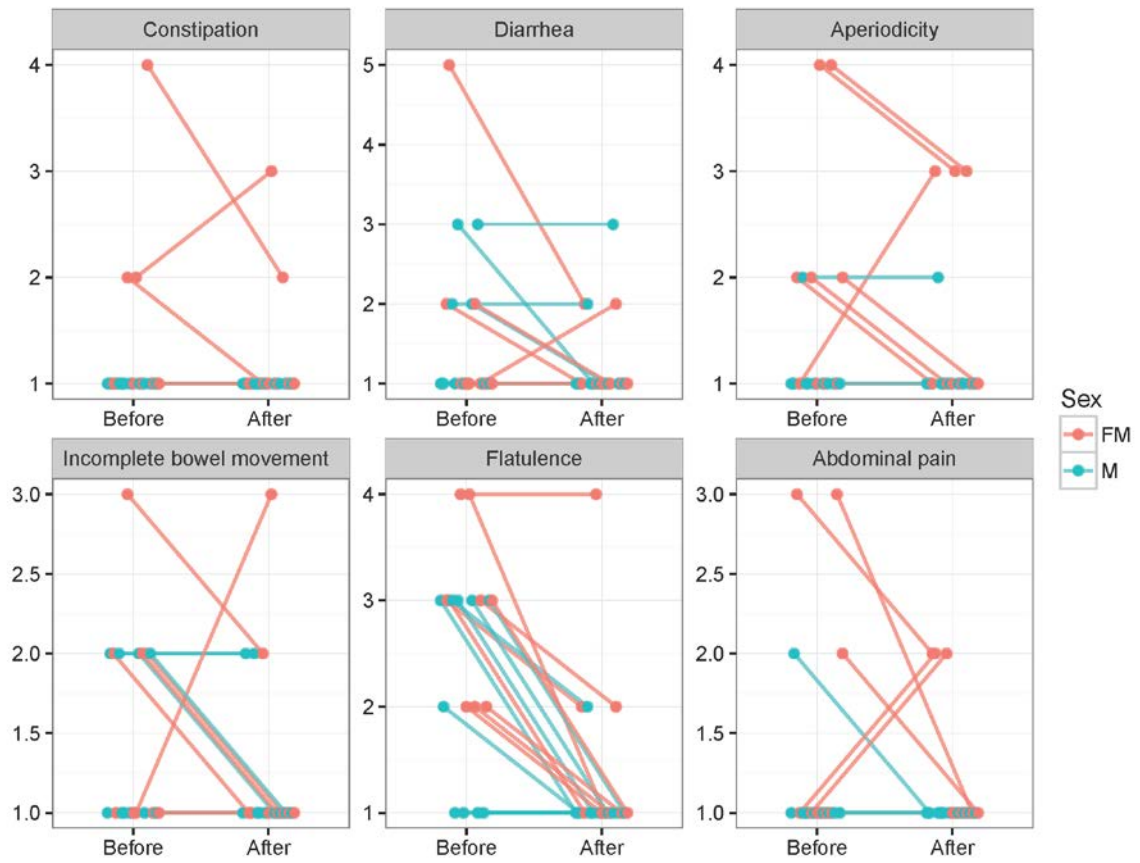

S5 Fig. Investigation of interaction effects between sex and relief of gastrointestinal symptoms
