# Supplementary material for: Methanobrevibacter attenuation via probiotic intervention reduces flatulence in adult human: A non-randomised paired-design clinical trial of efficacy
Source: PubMed Central journal article supplement (PMC5609747; doi:10.1371/journal.pone.0184547), 2017-09-22
Supplement: pone.0184547.s012.pdf [file pone.0184547.s012.pdf]

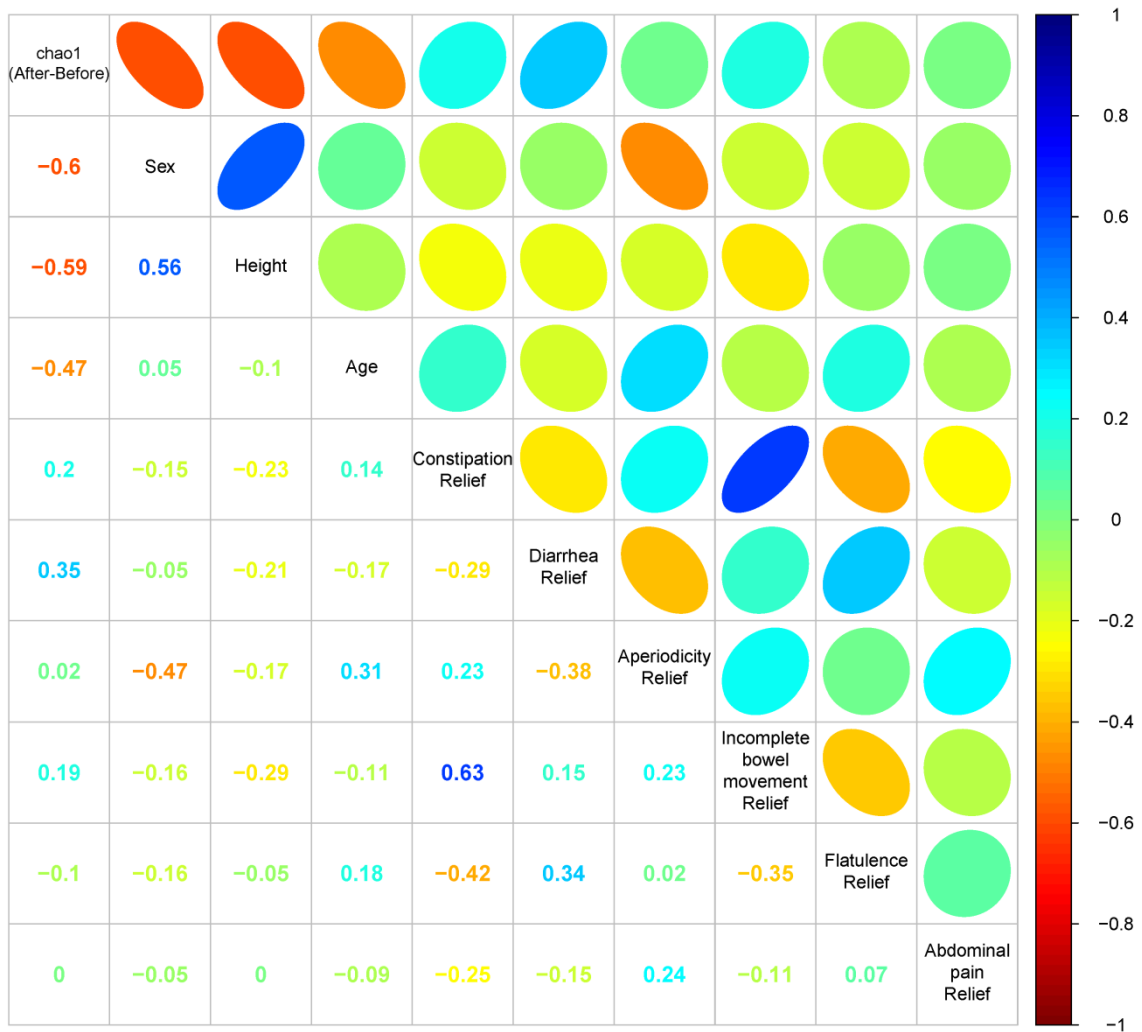

S1 Fig. Correlation plot to investigate relationships between microbiome diversity and others.
